# Supplementary material for: Fullerene derivative with a branched alkyl chain exhibits enhanced charge extraction and stability in inverted planar perovskite solar cells
Source: Royal Society of Chemistry journal article supplement (doi:10.1039/c7nj04978a), 2018-01-01
Supplement: c7nj04978a1.pdf [file c7nj04978a1.pdf]

## Supporting Information

### **Fullerene derivative with a branched alkyl chain exhibits enhanced charge extraction and stability in inverted planar perovskite solar cells**

Chengbo Tian,<sup>†a</sup> Edison Castro,<sup>†a</sup> German Betancourt-Solis,<sup>a</sup> Ziang Nan,<sup>b</sup> Olivia Fernandez-Delgado,<sup>a</sup> Sohan Jankuru,<sup>a</sup> and Luis Echegoyen<sup>\*a</sup>

<sup>a</sup>Department of Chemistry, University of Texas at El Paso, 500 West University Avenue, El Paso, TX 79968, United States

<sup>b</sup>iChEM (Collaborative Innovation Center of Chemistry for Energy Materials), Department of Chemistry, College of Chemistry and Chemical Engineering, Xiamen University, Xiamen 361005, China.

<sup>†</sup>These authors contributes equally to this work.

\*E-mail: [echegoyen@utep.edu](mailto:echegoyen@utep.edu)

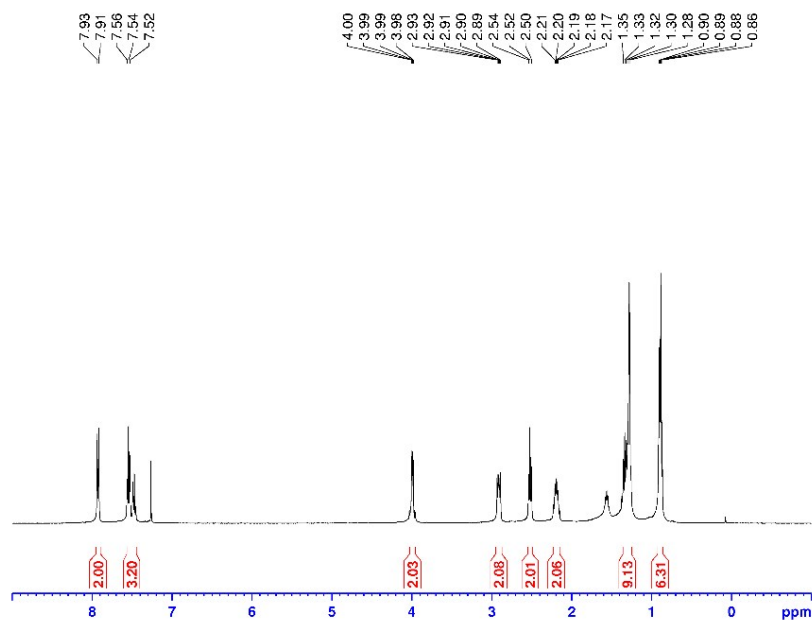

**Figure S1.**  $^1\text{H}$ -NMR (600 MHz;  $\text{CDCl}_3$ , 298 K) of  $\text{PC}_{61}\text{BEH}$

$^1\text{H}$  NMR (600 MHz;  $\text{CDCl}_3$ , 298 K)  $\delta$  (ppm) 7.92 (d,  $J = 12.7$  Hz, 2H), 7.55 (d,  $J = 13.2$  Hz, 2H), 7.52 (t,  $J = 13.5$ , Hz, 1H), 3.99 (q,  $J = 12.3$  Hz, 2H), 2.91 (m, 2H), 2.52 (t,  $J = 13.8$  Hz, 2H), 7.92 (m, 2H), 1.32 (m, 9H), 0.88 (m, 6H).

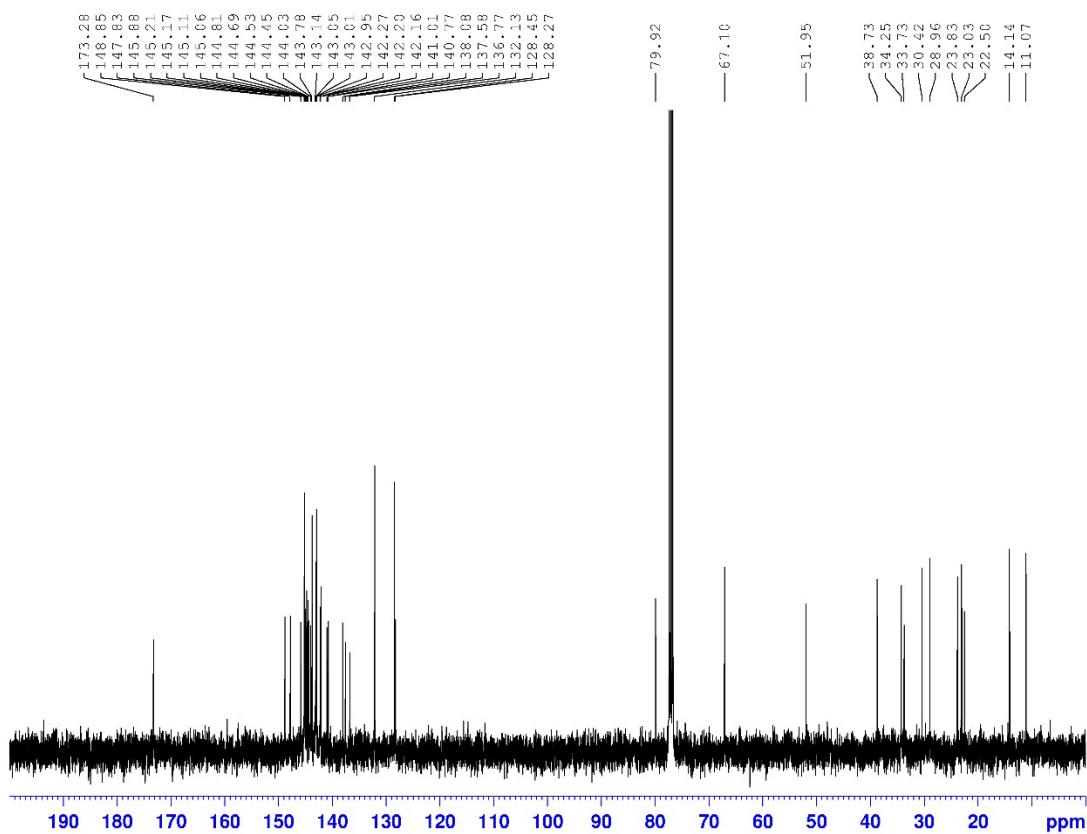

**Figure S2.**  $^{13}\text{C}$ -NMR (150 MHz;  $\text{CDCl}_3$ , 298 K) of  $\text{PC}_{61}\text{BEH}$ .

$^{13}\text{C}$  NMR (150 MHz;  $\text{CDCl}_3$ , 298 K)  $\delta$  (ppm) 173.28, 148.85, 147.83, 145.88, 145.21, 145.17, 145.11, 145.06, 144.81, 144.69, 144.53, 144.45, 144.03, 143.78, 143.14, 143.05, 143.01, 142.95, 142.27, 142.20, 142.16, 141.01, 140.77, 138.08, 137.58, 136.77, 132.13, 128.45, 128.26, 79.92, 67.10, 51.95, 38.73, 34.25, 33.73, 30.42, 28.96, 23.83, 23.03, 22.50, 14.14, 11.07.

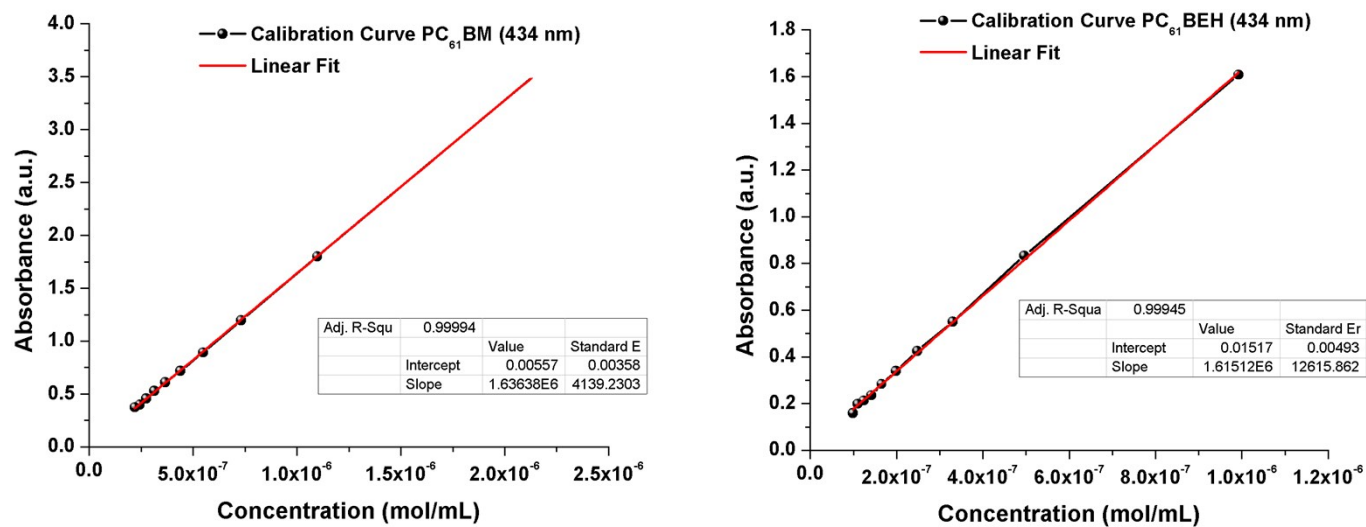

**Figure S3.** Calibration curves for PC<sub>61</sub>BM and PC<sub>61</sub>BEH in chlorobenzene at 434 nm.

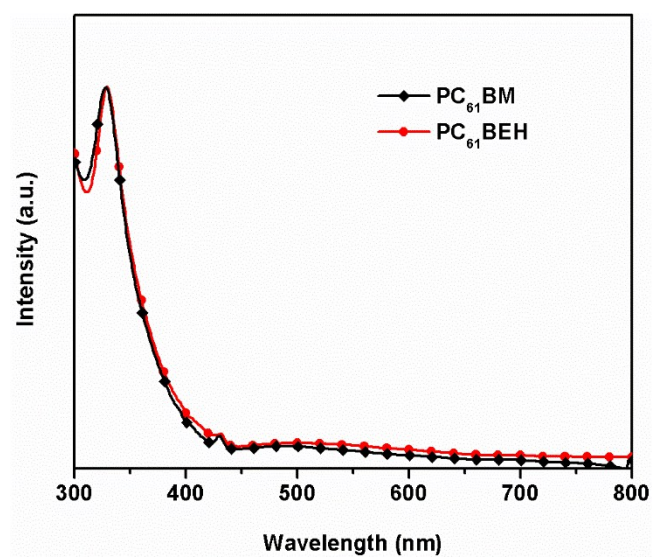

**Figure S4.** UV-Vis absorption spectra of PC<sub>61</sub>BEH and PC<sub>61</sub>BM in toluene solution.

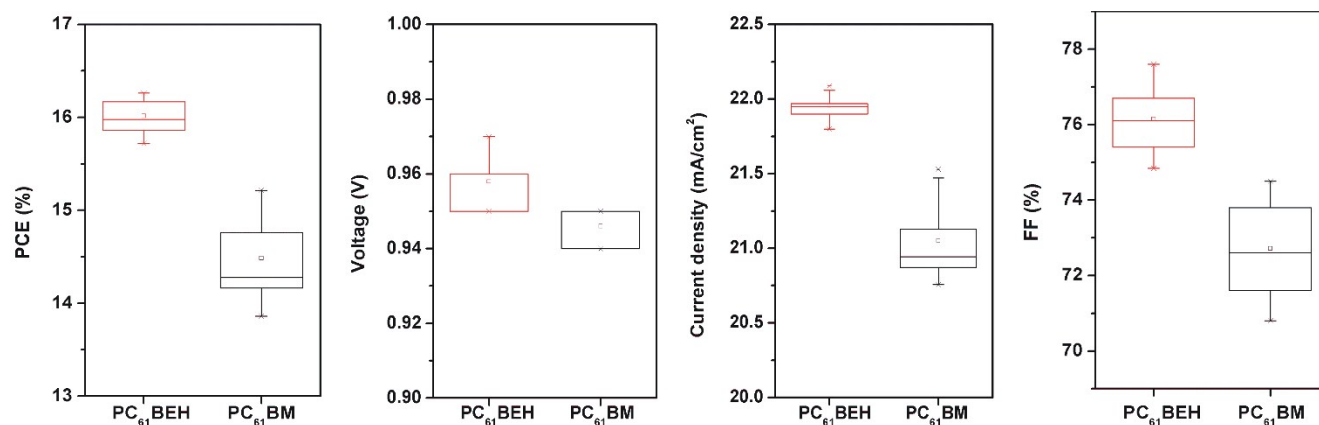

**Figure S5.** The statistic diagram of the device PCE,  $V_{oc}$ ,  $J_{sc}$  and  $FF$  measured for 20 individual devices based on PC<sub>61</sub>BM and PC<sub>61</sub>BEH ETMs.

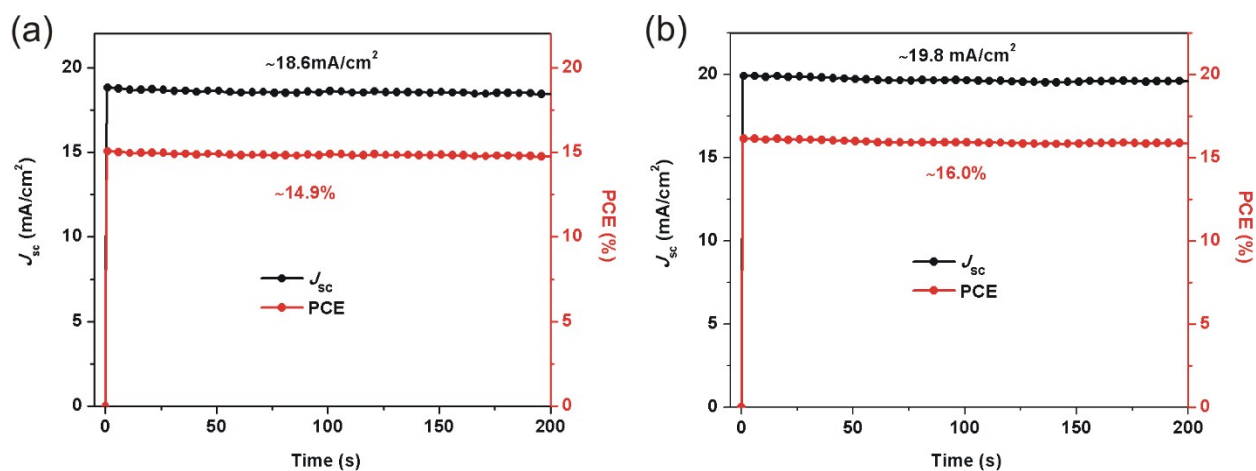

**Figure S6.** Maximal steady-state photocurrent output at the maximum power point for a) PC<sub>61</sub>BM (at 0.8 V) and b) PC<sub>61</sub>BEH (at 0.81 V) based device and its corresponding power output.

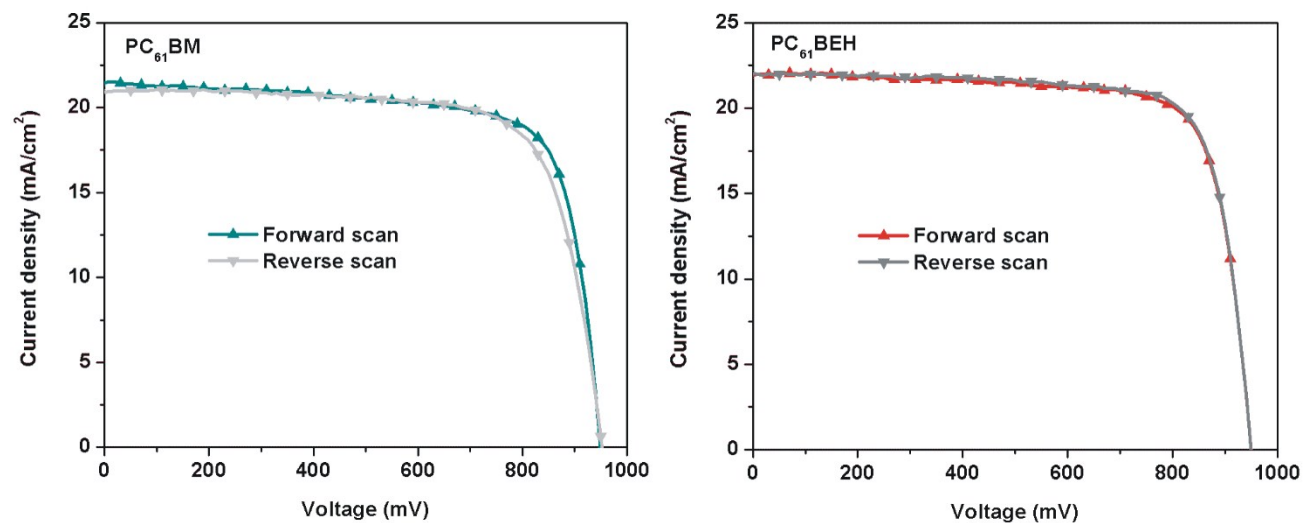

**Figure S7.**  $J$ - $V$  curves of the inverted planar perovskite solar cells based on PC<sub>61</sub>BM and PC<sub>61</sub>BEH with respect to forward and reverse scan directions (The scanning rate was 100 mV/s).

**Table S1.** Redox Potentials of PC<sub>61</sub>BM and PC<sub>61</sub>BEH.

| Compound             | E <sup>0/-</sup> | E <sup>-/-2</sup> | E <sup>-2/-3</sup> |
|----------------------|------------------|-------------------|--------------------|
| PC <sub>61</sub> BM  | -1.03            | -1.41             | -1.90              |
| PC <sub>61</sub> BEH | -1.03            | -1.41             | -1.89              |

**Table S2.** R<sub>ct</sub> and R<sub>rec</sub> values obtained from PC<sub>61</sub>BM and PC<sub>61</sub>BEH based devices.

| Device               | R <sub>ct</sub> (Ω) | R <sub>rec</sub> (Ω) |
|----------------------|---------------------|----------------------|
| PC <sub>61</sub> BM  | 3119                | 16658                |
| PC <sub>61</sub> BEH | 1711                | 18331                |
